# Supplementary material for: Design and optimization of a Cu-MOF@graphene oxide nanozyme for point-of-care colorimetric determination of sarcosine and H2O2
Source: Royal Society of Chemistry journal article supplement (doi:10.1039/d6ra01609j), 2026-05-12
Supplement: d6ra01609j1.pdf [file d6ra01609j1.pdf]

## Supplementary information

For

**Design and Optimization of a Cu–MOF@Graphene Oxide Nanozyme for On-site  
Colorimetric Determination of the Prostate Cancer Biomarker Sarcosine**

**Martin N. Saad <sup>a\*</sup>, Amr M. Mahmoud <sup>a</sup>, Sawsan M. Amer <sup>a</sup>, Ibrahim M. El-Sherbiny <sup>b\*\*</sup>,  
Hoda M. Marzouk <sup>a</sup>**

*<sup>a</sup> Pharmaceutical Analytical Chemistry Department, Faculty of Pharmacy, Cairo University, El-Kasr El-Aini Street, 11562 Cairo, Egypt*

*<sup>b</sup> Nanomedicine Research Labs, Center for Materials Science CMS, Zewail City of Science and Technology, 6th October City, 12578, Giza, Egypt.*

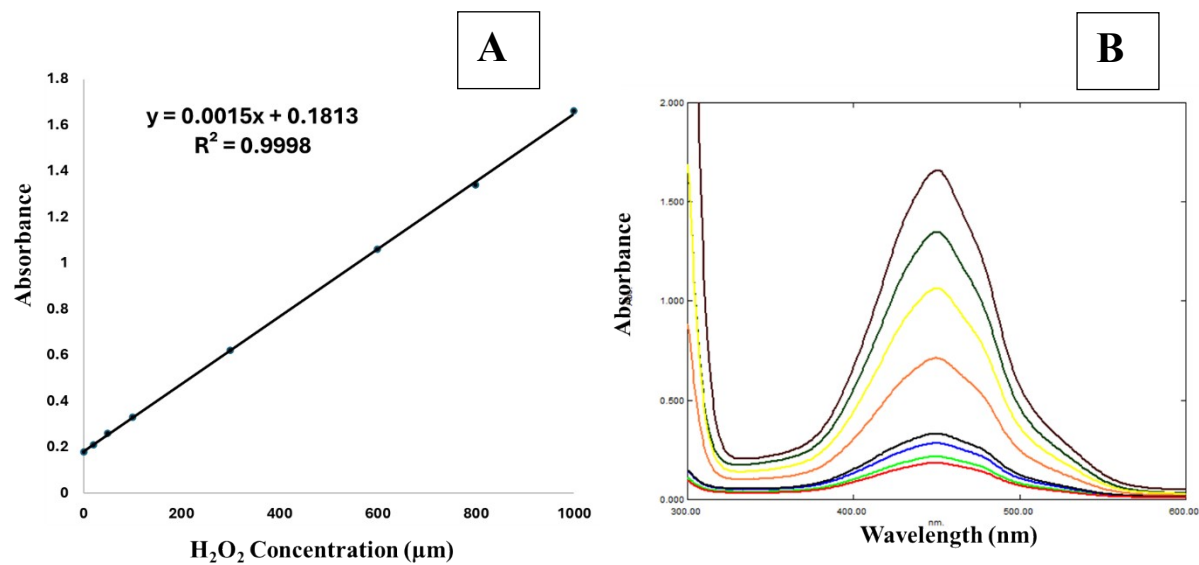

**Figure S1.** The linear calibration curve of different H<sub>2</sub>O<sub>2</sub> concentrations using fixed concentration of OPD and catalyst (A), and the absorption spectra of H<sub>2</sub>O<sub>2</sub> using the synthesized nanozymes as peroxidase mimetics (B).

Design-Expert® Software

Desirability

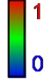

X1 = A: buffer pH  
X2 = B: OPD conc

Actual Factors  
C: Nanozyme conc = 1.05  
D: Temp = 39.74  
E: Incubation time = 9.35

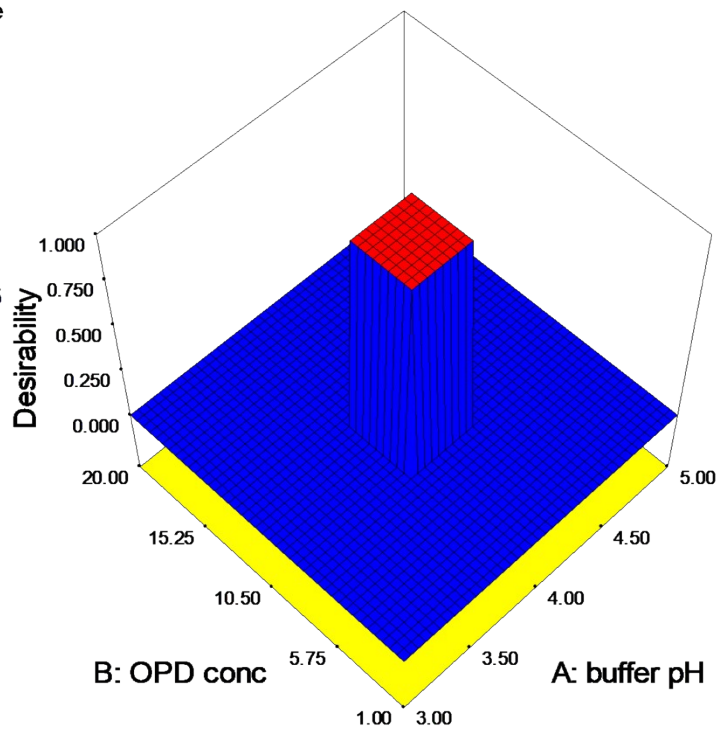

**Figure S2.** Experimental design desirability showing the optimum experimental conditions: buffer pH= 4, OPD concentration = 10 mM, nanozyme concentration = 1 mg/mL, temperature = 40 °C and incubation time = 10 minutes.

Design-Expert® Software

Absorbance

● Design Points

1.12

0.43

X1 = A: buffer pH

X2 = B: OPD conc

Actual Factors

C: Nanozyme conc = 1.00

D: Temp = 40.00

E: Incubation time = 10.00

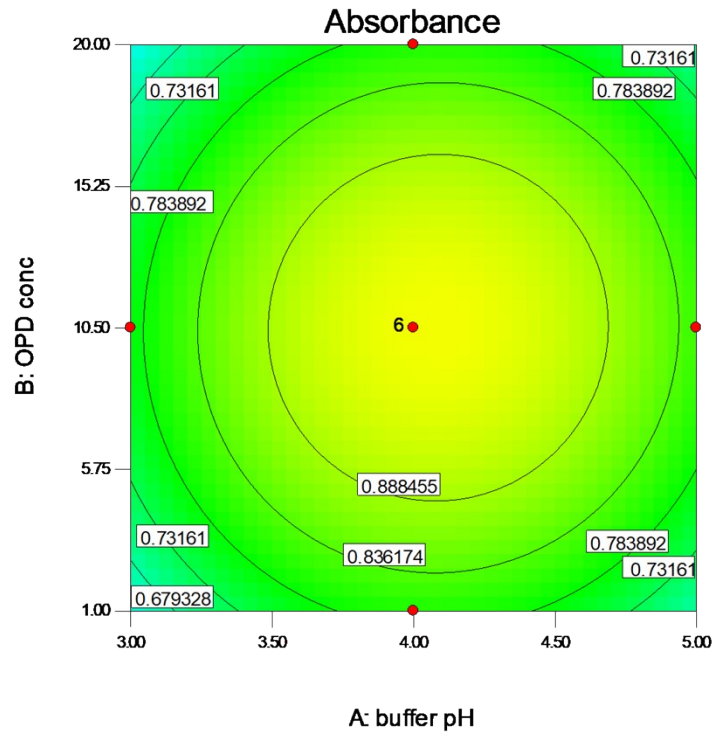

**Figure S3.** Experimental design results showing the optimum absorbance achieved at buffer pH= 4, OPD concentration = 10 mM, nanozyme concentration = 1 mg/mL, temperature = 40 °C and incubation time = 10 minutes.

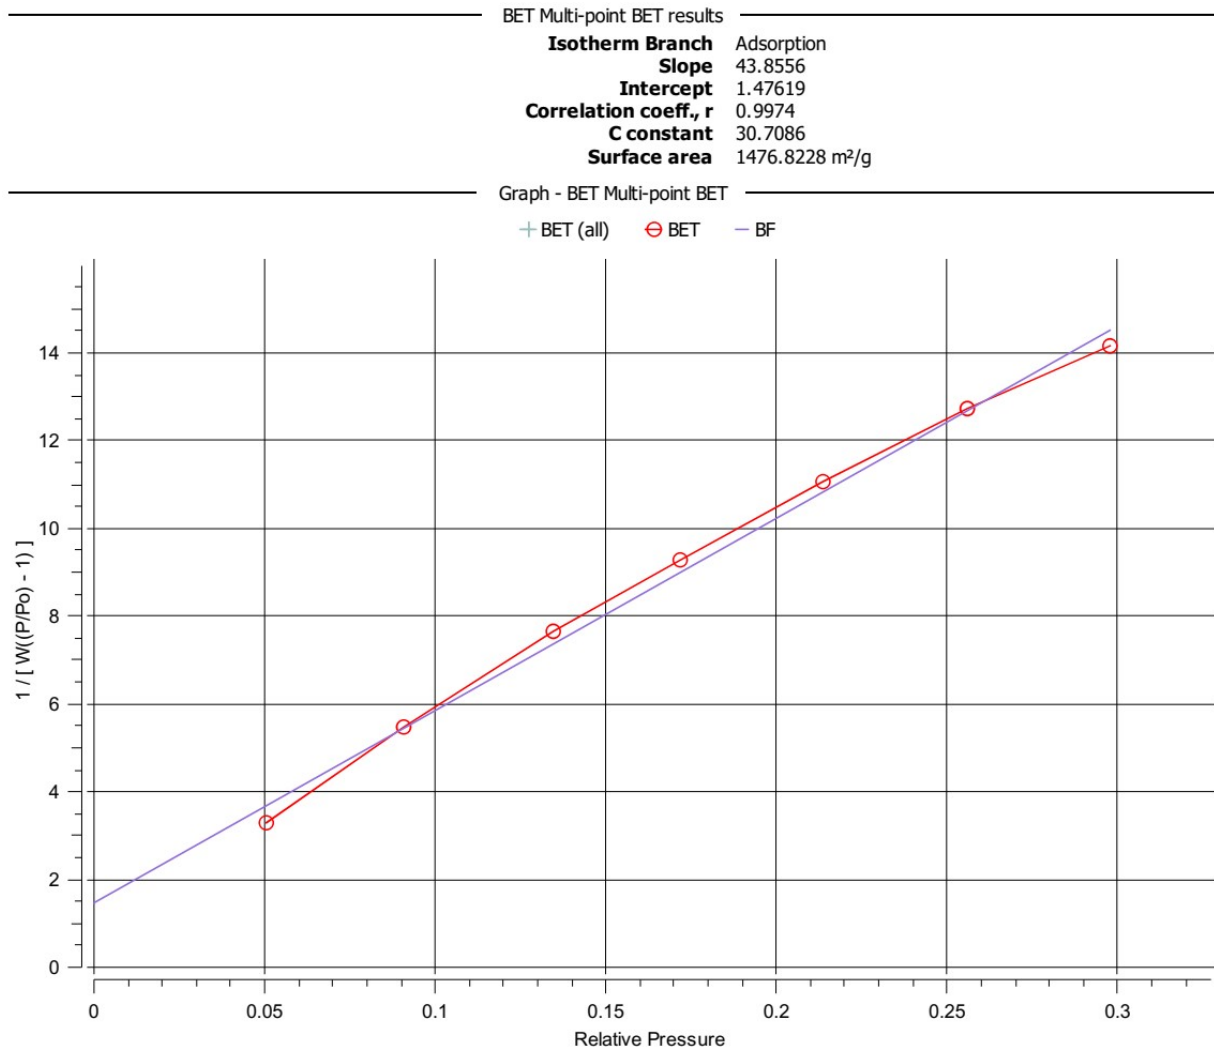

**Figure S4.** The N<sub>2</sub> adsorption, desorption isotherm plot for the prepared Cu-MOF@GO nanozymes.

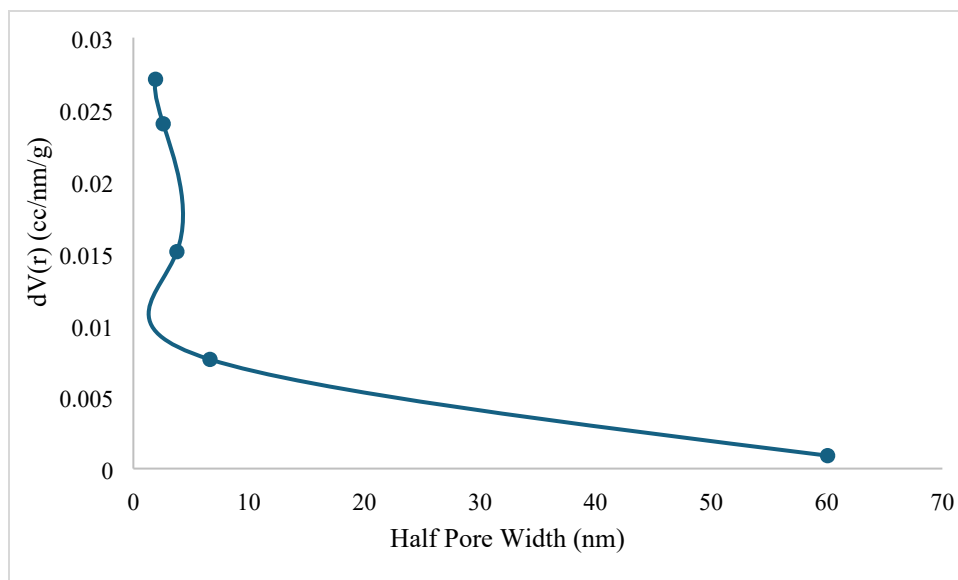

**Figure S5.** Pore size distribution of the prepared nanozymes

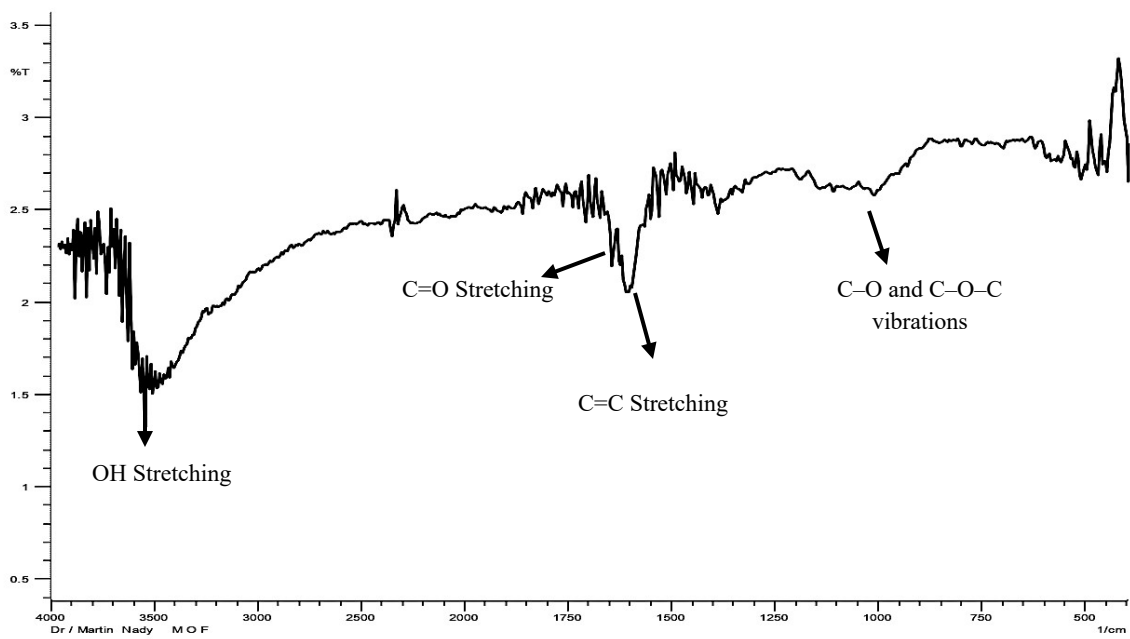

**Figure S6.** FTIR spectrum of the prepared Cu-MOF@GO nanozymes.

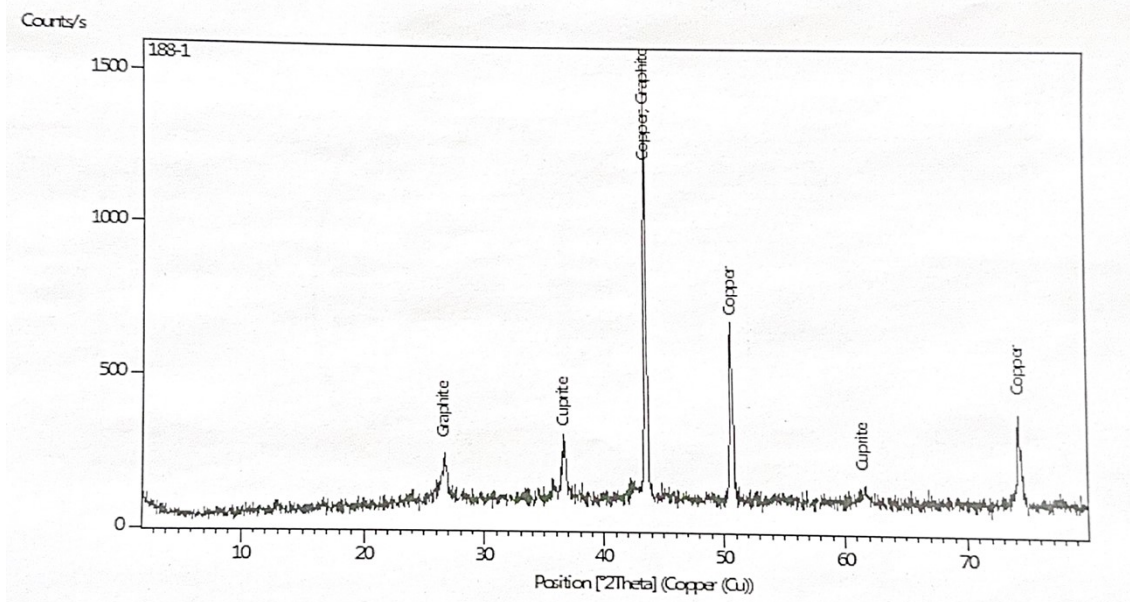

**Figure S7.** X-ray diffraction analysis (XRD) of the prepared Cu-MOF@GO nanozymes

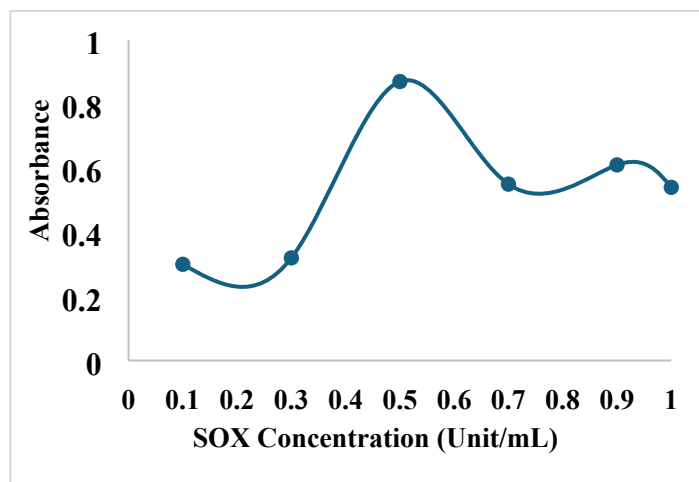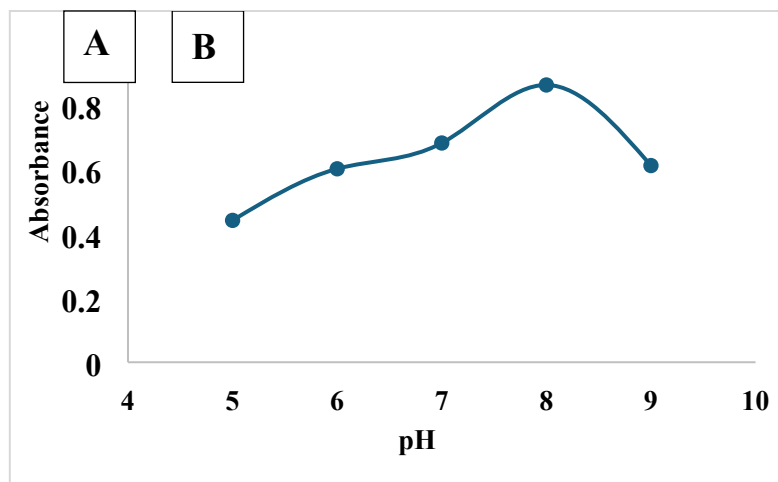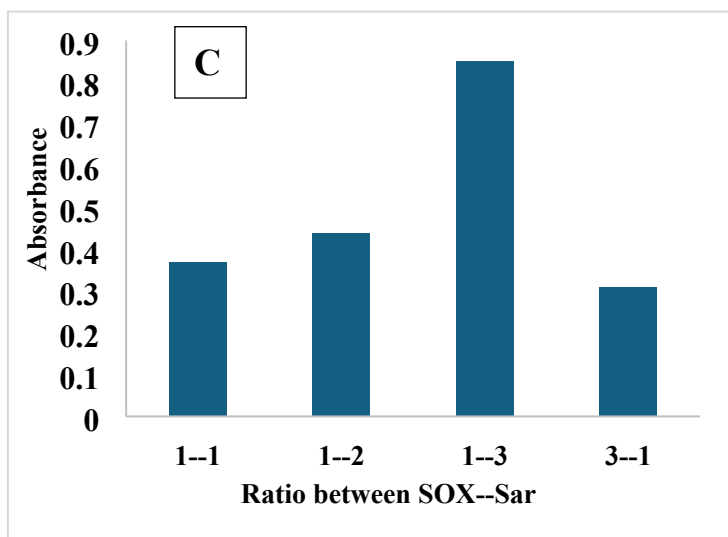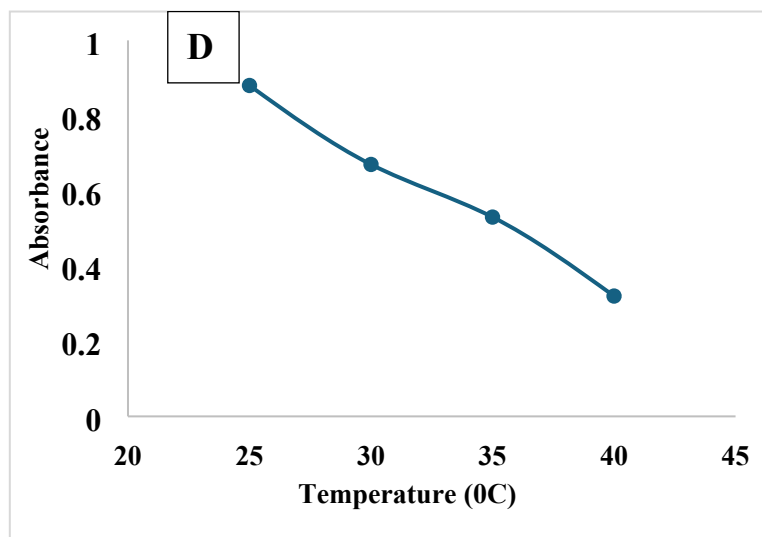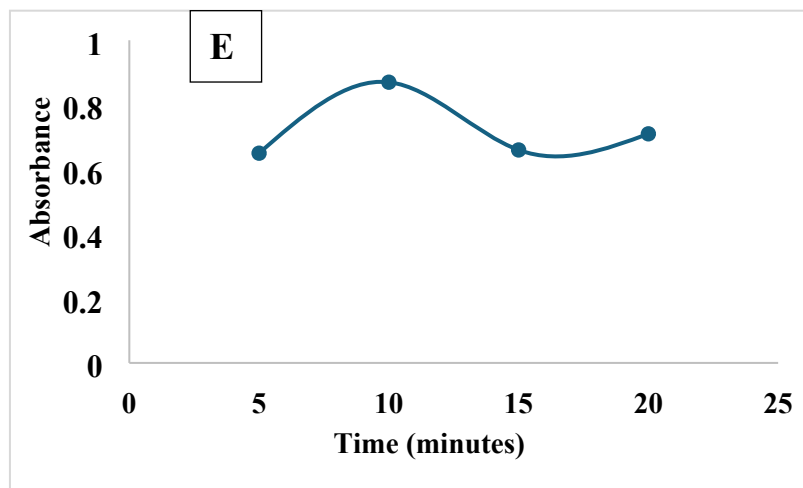

**Figure S8.** Optimization of the reaction between Sarcosine oxidase and sarcosine to produce  $H_2O_2$ .

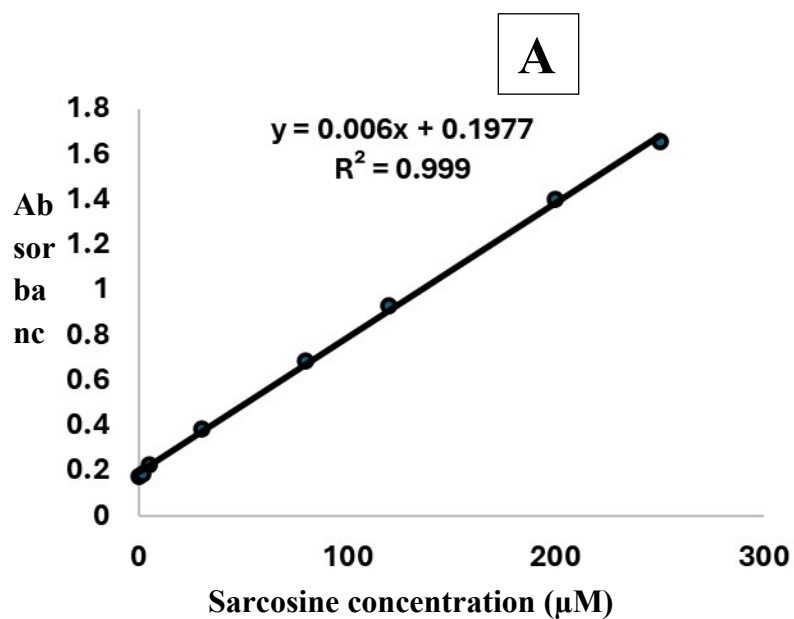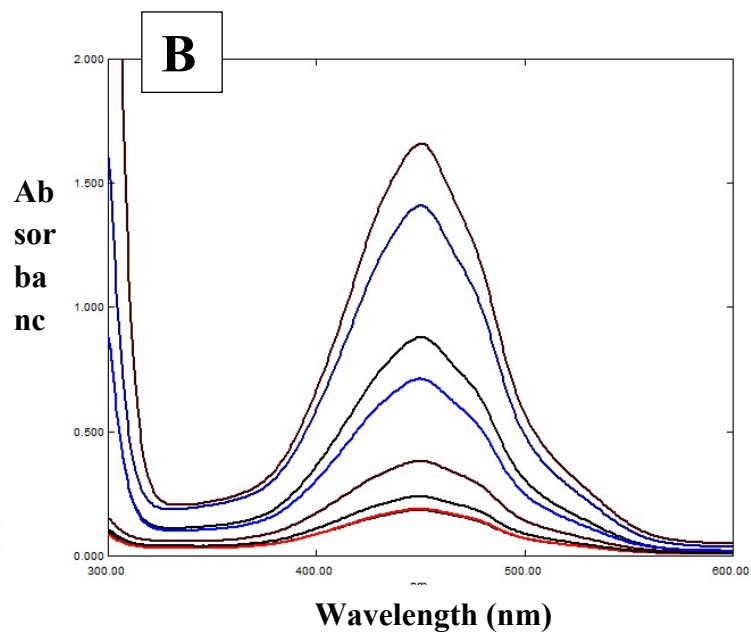

**Figure S9.** The linear calibration curve of different sarcosine concentrations (A) and the absorption spectra of using the synthesized nanozymes as peroxidase mimetics (B).

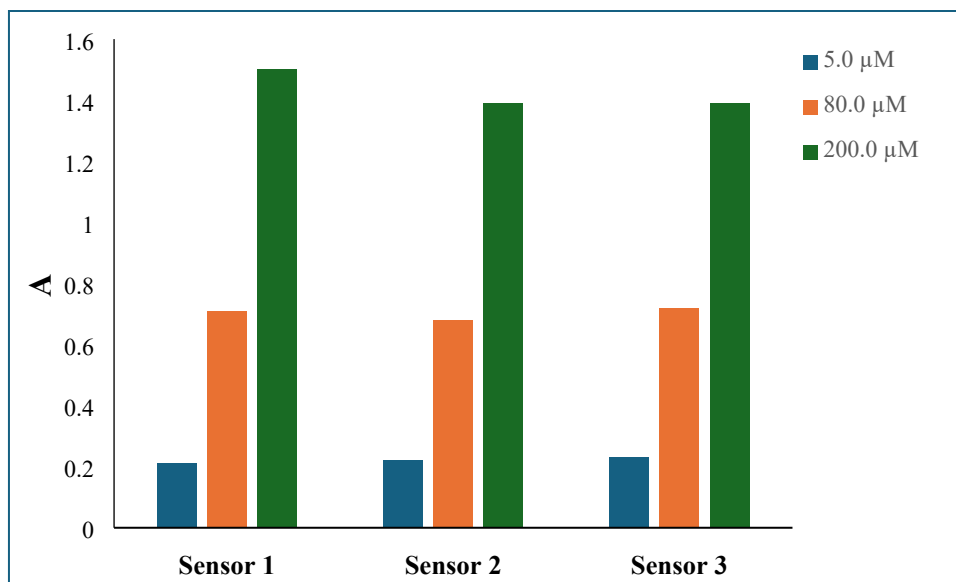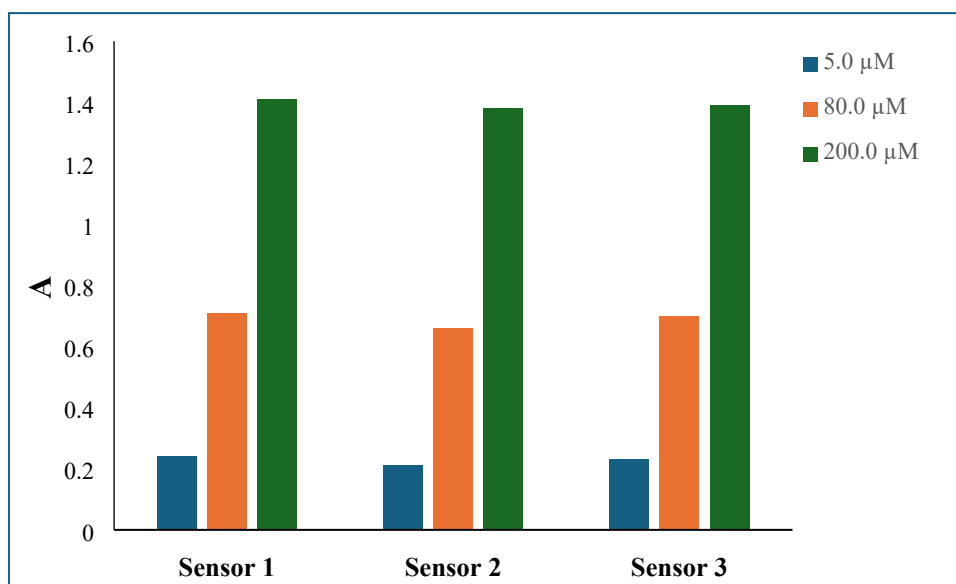

**Figure S10.** Diagrammatic illustration for (a): intra-batch, (b): inter-batch reproducibility of sensor fabrication process.

**Table S1.** Design of experiment showing the 5 factors: buffer pH, OPD concentration, nanozyme concentration, temperature and incubation time, also showing measured responses (Absorbances).

| <b>Run</b> | <b>Factor 1<br/>buffer pH</b> | <b>Factor 2<br/>OPD conc.<br/>(mM)</b> | <b>Factor 3<br/>Nanozyme<br/>conc.<br/>(mg/mL)</b> | <b>Factor 4<br/>Temp<br/>(°C)</b> | <b>Factor 5<br/>Incubation<br/>time<br/>(Minutes)</b> | <b>Response 1<br/>Absorbance</b> |
|------------|-------------------------------|----------------------------------------|----------------------------------------------------|-----------------------------------|-------------------------------------------------------|----------------------------------|
| 1          | 3                             | 1                                      | 0.5                                                | 45                                | 5                                                     | 0.56                             |
| 2          | 4                             | 10.5                                   | 1                                                  | 40                                | 10                                                    | 1.1                              |
| 3          | 5                             | 20                                     | 1.5                                                | 35                                | 5                                                     | 0.52                             |
| 4          | 3                             | 10.5                                   | 1                                                  | 40                                | 10                                                    | 0.52                             |
| 5          | 4                             | 10.5                                   | 1.5                                                | 40                                | 10                                                    | 1.12                             |
| 6          | 5                             | 1                                      | 1.5                                                | 35                                | 15                                                    | 0.54                             |
| 7          | 5                             | 10.5                                   | 1                                                  | 40                                | 10                                                    | 0.83                             |
| 8          | 4                             | 1                                      | 1                                                  | 40                                | 10                                                    | 0.62                             |
| 9          | 4                             | 10.5                                   | 1                                                  | 40                                | 10                                                    | 1.1                              |
| 10         | 4                             | 10.5                                   | 1                                                  | 45                                | 10                                                    | 0.7                              |
| 11         | 3                             | 1                                      | 0.5                                                | 35                                | 15                                                    | 0.51                             |
| 12         | 3                             | 20                                     | 0.5                                                | 45                                | 15                                                    | 0.43                             |
| 13         | 3                             | 20                                     | 1.5                                                | 35                                | 15                                                    | 0.66                             |
| 14         | 4                             | 10.5                                   | 1                                                  | 40                                | 5                                                     | 0.66                             |
| 15         | 3                             | 20                                     | 1.5                                                | 45                                | 5                                                     | 0.64                             |
| 16         | 5                             | 20                                     | 0.5                                                | 35                                | 15                                                    | 0.62                             |
| 17         | 4                             | 20                                     | 1                                                  | 40                                | 10                                                    | 0.74                             |
| 18         | 5                             | 1                                      | 0.5                                                | 45                                | 15                                                    | 0.71                             |
| 19         | 4                             | 10.5                                   | 1                                                  | 40                                | 10                                                    | 1.1                              |
| 20         | 5                             | 20                                     | 0.5                                                | 45                                | 5                                                     | 0.78                             |
| 21         | 5                             | 1                                      | 0.5                                                | 35                                | 5                                                     | 0.69                             |
| 22         | 5                             | 1                                      | 1.5                                                | 45                                | 5                                                     | 0.72                             |
| 23         | 3                             | 1                                      | 1.5                                                | 35                                | 5                                                     | 0.74                             |
| 24         | 4                             | 10.5                                   | 0.5                                                | 40                                | 10                                                    | 0.77                             |
| 25         | 5                             | 20                                     | 1.5                                                | 45                                | 15                                                    | 0.71                             |
| 26         | 4                             | 10.5                                   | 1                                                  | 35                                | 10                                                    | 0.82                             |
| 27         | 4                             | 10.5                                   | 1                                                  | 40                                | 10                                                    | 1.1                              |
| 28         | 4                             | 10.5                                   | 1                                                  | 40                                | 10                                                    | 1.1                              |
| 29         | 4                             | 10.5                                   | 1                                                  | 40                                | 15                                                    | 0.81                             |
| 30         | 3                             | 20                                     | 0.5                                                | 35                                | 5                                                     | 0.8                              |
| 31         | 4                             | 10.5                                   | 1                                                  | 40                                | 10                                                    | 1.1                              |
| 32         | 3                             | 1                                      | 1.5                                                | 45                                | 15                                                    | 0.81                             |

**Table S2.** Controls for the proposed colorimetric sensor using Cu MOF@GO using optimum experimental conditions.

|                      | <b>SOX</b>                          | <b>Sar</b>                          | <b>Cu MOF@GO</b>                    | <b>OPD</b>                          | <b>Absorbance</b> |
|----------------------|-------------------------------------|-------------------------------------|-------------------------------------|-------------------------------------|-------------------|
| <b>Full reaction</b> | <input checked="" type="checkbox"/> | <input checked="" type="checkbox"/> | <input checked="" type="checkbox"/> | <input checked="" type="checkbox"/> | 1.01              |
| <b>Control 1</b>     | <input checked="" type="checkbox"/> | <input checked="" type="checkbox"/> | <input type="checkbox"/>            | <input checked="" type="checkbox"/> | 0.13              |
| <b>Control 2</b>     | <input type="checkbox"/>            | <input checked="" type="checkbox"/> | <input checked="" type="checkbox"/> | <input checked="" type="checkbox"/> | 0.10              |
| <b>Control 3</b>     | <input checked="" type="checkbox"/> | <input type="checkbox"/>            | <input checked="" type="checkbox"/> | <input checked="" type="checkbox"/> | 0.12              |
| <b>Control 4</b>     | <input checked="" type="checkbox"/> | <input checked="" type="checkbox"/> | <input checked="" type="checkbox"/> | <input type="checkbox"/>            | 0.04              |
